# Supplementary material for: Multicenter Evaluation of the Accelerate PhenoTest BC Kit for Rapid Identification and Phenotypic Antimicrobial Susceptibility Testing Using Morphokinetic Cellular Analysis
Source: PubMed Central journal article supplement (PMC5869823; doi:10.1128/jcm.01329-17), 2018-03-26
Supplement: JCM.01329-17_zjm999095863s1.pdf [file JCM.01329-17_zjm999095863s1.pdf]

1 **Supplemental Materials**

2

3 **Definitions/Abbreviations**

4 Categorical Agreement (CA) – Percent of all test results with same category result as the  
5 reference result.

6 Essential Agreement (EA) – Percent of all test results within one 2-fold dilution of the reference  
7 result

8 False negative (FN) – Test negative and reference positive

9 False positive (FP) – Test positive and reference negative

10 Gram stain resolved/mitigated – Accelerate Pheno system incorrect identification result that  
11 could be arbitrated by comparison with Gram stain results. (i.e. Accelerate Pheno™ system  
12 *Staphylococcus aureus* identification result determined to be a false-positive due to comparison  
13 with a Gram stain result containing only Gram-negative rods.)

14 Gram stain unresolved/unmitigated - Accelerate Pheno system incorrect identification result that  
15 could not be arbitrated by comparison with Gram stain results. (i.e. Accelerate Pheno™ system  
16 *Klebsiella* spp. identification result that was actually *E. coli*. Comparison with a Gram stain  
17 result containing only Gram-negative rods would fail to resolve.)

18 Invalid – No results reported for a sample

19 Indeterminate – No results reported for a FISH ID probe

20 Major Error (ME) – Percent of reference-susceptible results that are test resistant (false-  
21 resistance)

22 Minor Error (mE) – Percent of all test results where one result (test or reference) is intermediate  
23 and the other is not.

24 Negative Percent Agreement (NPA) – The number of true negative results for a diagnostic test  
25 divided by the number of negative results by the reference method. Same calculation as  
26 specificity.

27 Positive Percent Agreement (PPA) – The number of true positive results for a diagnostic test  
28 divided by the number of positive results by the reference method. Same calculation as  
29 sensitivity.

30 Positive Predictive Value (PPV) – The number of true positive results divided by all positive  
31 results for a diagnostic test.

32 Sensitivity (clinical) – How often a diagnostic test is positive in diseased patients

33 Specificity (clinical) – How often a diagnostic test is negative in non-diseased patients

34 True negative (TN) = Test negative and reference negative

35 True positive (TP) = Test positive and reference positive

36 Valid – Results reported for a sample

37 Very Major Error (VME) – Percent of reference-resistant results that are test susceptible (false-  
38 susceptible)

39

#### 40 **Equations**

41 Essential Agreement Rate:  $\%EA = [100 \times (\text{Number of test MIC results within one doubling}$   
42  $\text{dilution of reference MIC})] / (\text{Total number of results})$

43 Categorical Agreement Rate:  $\%CA = [100 \times (\text{Number of test results in categorical agreement with}$   
44  $\text{reference})] / (\text{Total number of results})$

45 Indeterminate Rate:  $\%IND = (100 \times IND) / (\text{total tests})$

46 Invalid Rate:  $\%INV = (100 \times INV) / (\text{total tests})$

47 Major Error Rate:  $\%ME = [100 \times (\text{Number of false-resistant test results})] / (\text{Total susceptible}$   
48  $\text{results by reference})$

49 Minor Error Rate:  $\%mE = [100 \times (\text{Number of results where one result is intermediate and the}$   
50  $\text{other result is susceptible or resistant})] / (\text{Total number of results})$

51 Positive Predictive Value:  $PPV = (100 \times TP) / (TP + FP)$

52 Sensitivity/PPA =  $(100 \times TP) / (TP + FN)$

53 Specificity/NPA =  $(100 \times TN) / (TN + FP)$

54 Very Major Error Rate:  $\%VME = [100 \times (\text{Number of false-susceptible test results})] / (\text{Total}$   
55  $\text{resistant results by reference})$

56

#### 57 **Methods**

58 **Study Phases.** In Phase I, fresh BC samples were tested and analyzed at 11 of the 13

59 clinical sites participating in the study, and seeded samples were provided, tested, and analyzed

60 at 11 sites. Nine clinical sites tested both fresh and seeded samples. In Phase II, five of the

61 clinical sites enrolled and tested positive BC prepared from fresh and seeded samples with the

62 Accelerate Pheno™ system. Reference testing was performed at the reference laboratory Phase

63 III was carried out at Accelerate Diagnostics, Inc. (Tucson, AZ) using only seeded samples and  
64 all reference testing was performed on-site during this phase. Phases II and III provided  
65 additional data for certain organism/antimicrobial combinations for which there was insufficient  
66 enrollment in Phase I.

67 **Bottle Types.** BACTEC™ (n=10) (Becton Dickinson, Baltimore, MD), BacT/ALERT®  
68 (n=1) (bioMérieux, Marcy-l'Étoile, France), or VersaTREK® (n=1) (Thermo Fisher Scientific,  
69 Waltham, MA) blood culture systems were used at the clinical sites. Accelerate Diagnostics, Inc.  
70 used both BACTEC™ and VersaTREK® bottles. BacT/ALERT® SA Standard Aerobic and SN  
71 Anaerobic bottles, BACTEC™ Standard/10 Aerobic/F Medium, BACTEC™ Standard  
72 Anaerobic/F Medium, BACTEC™ Plus Aerobic/F Medium, BACTEC™ Plus Anaerobic/F  
73 Medium, BACTEC™ PEDS PLUS/F Medium, BACTEC™ Lytic/10 Anaerobic/F Medium,  
74 VersaTREK® Redox 1 Aerobic Media, and VersaTREK® Redox 2 Anaerobic Media were used  
75 with their corresponding systems. Fresh samples from mycobacterial type blood culture media  
76 (BACTEC™ Myco/F Lytic, BacT/ALERT® MP Bottle, VersaTREK® Myco) were excluded.

77 **Seeded Sample Preparation.** Seeded samples were prepared by spiking clinical isolates  
78 into blood culture media containing 10 mL of commercially available healthy human whole  
79 blood (Bioreclamation, Baltimore, MD) collected in 6% w/v sodium polyanetholesulfonate (SPS;  
80 Sigma Aldrich, St. Louis, MO). Seeded bottles were loaded onto automated blood culture  
81 instruments and incubated according to the system's specifications. Organisms for spiking were  
82 suspended in normal saline and standardized to a 0.5 McFarland concentration for bacteria (~1.5  
83 x 10<sup>8</sup> CFU/mL), or a 2 McFarland concentration for yeast (~5 x 10<sup>6</sup> CFU/mL). The suspensions  
84 underwent three 1:100 serial dilutions before inoculating the blood culture bottle with 500 µL to  
85 produce a final concentration of ~75 CFU per bottle.

86           **Frozen Isolate Preparation at Clinical Site for AST Discrepancy Testing.** Frozen  
87 isolates were prepared from sub-cultured plates as described earlier. The plates used for  
88 preparation of frozen isolates were sub-cultured from refrigerated sub-culture plates of the  
89 original positive blood culture. In some cases, the sub-cultured plates of the original positive  
90 blood culture were removed from the refrigerator, parafilmed and sent to Accelerate Diagnostics,  
91 Inc. directly.

92           **Reference AST Testing.** The reference standard for AST comparator testing were the  
93 Clinical and Laboratory Standard Institute (CLSI) reference frozen broth microdilution (BMD)  
94 panels made in-house at Accelerate Diagnostics, Inc., and shipped to the reference laboratory.  
95 BMD panels were prepared using cation-adjusted Mueller Hinton Broth (CAMHB) (BD, Difco,  
96 Catalogue number 275730) and antibiotics obtained from Merck, Sigma, USP and Pfizer. Cation  
97 concentrations for CAMHB were tested externally using ICP-OES as required by CLSI, and  
98 every BMD lot underwent biological quality control testing per CLSI standards (1, 2). In order  
99 to account for MIC variability seen in BMD for some isolates, each isolate was tested in  
100 triplicate (1) and the modal MIC was used as the comparator. If no modal MIC was obtained,  
101 triplicate BMD was repeated for the sample and the modal MIC was used from the results of the  
102 six repeats. If no modal MIC was obtained after 6 replicate BMD tests, the sample was excluded  
103 from analysis. For cefoxitin testing of staphylococci, disk diffusion was performed with FOX-30  
104 disks (Hardy Diagnostics, Santa Maria, CA, Catalog number 231590) on MHA plates (Becton  
105 Dickinson). For cases in which the test failed (due to sparse growth, hazy or double zones,  
106 heterogeneous growth) or if the disk diffusion zone of growth inhibition was within 1 mm of the  
107 breakpoint, testing was repeated in triplicate and the modal category from the 4 repeats used as

108 the comparator. If no modal category was obtained after repeat testing, the sample was excluded  
109 from analysis.

110 **Quality Control (QC) Testing on the Accelerate Pheno™ system.** For the Accelerate  
111 Pheno™ system, one QC panel (EPEES, SES, CASKS, Table 1) was run on one module per day.  
112 The panels were rotated such that each panel was tested at least once per week. QC testing was  
113 rotated between modules such that all modules were used to perform QC at approximately the  
114 same frequency. QC panels were run per manufacturer instructions (3).

115 **Table 1: QC panels and organisms for ID and/or AST**

| QC Panel    | Species                           | Strain Number  |
|-------------|-----------------------------------|----------------|
| EPEES (AST) | <i>Escherichia coli</i>           | ATCC® 25922™   |
|             | <i>Escherichia coli</i>           | ATCC® 35218™   |
|             | <i>Pseudomonas aeruginosa</i>     | ATCC® 27853™   |
|             | <i>Enterococcus faecalis</i>      | ATCC® 29212™   |
|             | <i>Staphylococcus aureus</i>      | ATCC® 29213™   |
| SES (AST)   | <i>Enterococcus faecalis</i>      | ATCC® 51299™   |
|             | <i>Staphylococcus aureus</i>      | ATCC® 43300™   |
|             | <i>Staphylococcus aureus</i>      | ATCC® BAA-977™ |
| CASKS (ID)  | <i>Staphylococcus lugdunensis</i> | ATCC® 700328™  |
|             | <i>Klebsiella pneumoniae</i>      | ATCC® 700603™  |
|             | <i>Acinetobacter baumannii</i>    | ATCC® 19606™   |
|             | <i>Citrobacter freundii</i>       | ATCC® 6879™    |
|             | <i>Streptococcus agalactiae</i>   | ATCC® 12403™   |
|             | <i>Candida glabrata</i>           | ATCC® 2001™    |

116

## 117 **References**

- 118 1. CLSI. Methods for Dilution Antimicrobial Susceptibility Tests for Bacteria That Grow Aerobically;  
119 Approved Standard—Ninth Edition. CLSI document M07-A9 (ISBN 1-56238-783-9 [Print]; ISBN 1-  
120 56238-784-7 [Electronic]). Clinical and Laboratory Standards Institute. , 950 West Valley Road,  
121 Suite 2500, Wayne, Pennsylvania 19087, USA, 2012.
- 122 2. CLSI. 2016. Performance Standards for Antimicrobial Susceptibility Testing. 26th ed. CLSI  
123 supplement M100S (ISBN 1-56238-923-8 [Print]; ISBN 1-56238-924-6 [Electronic]). Clinical and  
124 Laboratory Standards Institute, 950 West Valley Road, Suite 2500, Wayne, Pennsylvania 19087,  
125 USA.
- 126 3. Diagnostics A. 2017. Accelerate PhenoTest™ BC kit Instructions for Use.

127

128 **FIG S1** Sample Flowchart of Specimen Disposition at Time of FDA Clearance

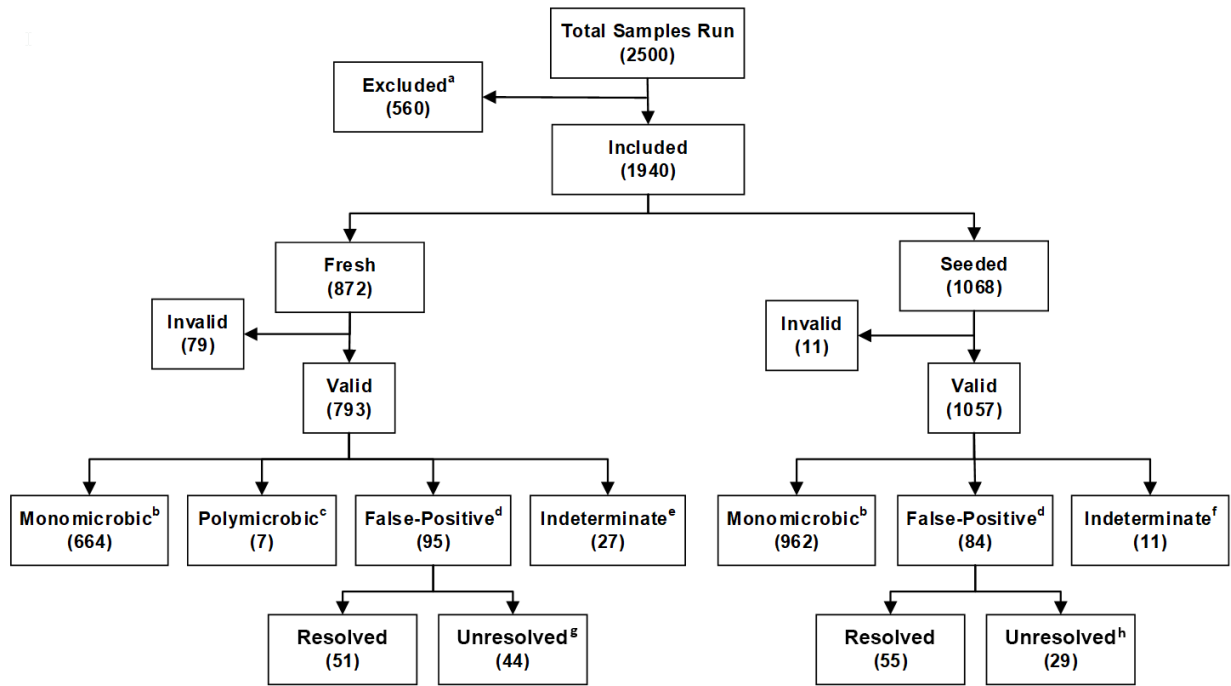

129

130

131 <sup>a</sup>Protocol Deviation (n=216); Experiments Halted (n=26); Experiments Never Ran (n=15); Bottle >8 h Post-Positivity (n=31);

132 Gram stain shows no organism (n=24); Isolate Not Received at Reference Laboratory (n=18); Isolate Received Later than 4 days

133 from Media Preparation (n=3); ID Reference Growth Failure (n=29); Non-Pure Isolate (n=169); ID Reference Purity Plate

134 Failure (n=6); Invalid ID Reference Result (n=1); Accelerate Pheno™ System Run State Not “Complete” (n=22)

135 <sup>b</sup>Single on-panel organism reported

136 <sup>c</sup>Polymicrobial samples where Accelerate PhenoTest™ BC kit ID results exactly match the reference

137 <sup>d</sup>Monomicrobial or polymicrobial runs containing any false positive(s)

138 <sup>e</sup>Fresh samples with only indeterminate/negative results = 27, Fresh samples including indeterminate result(s) = 74

139 <sup>f</sup>Seeded samples with only indeterminate/negative results = 11, Seeded samples including indeterminate result(s) = 198

140 <sup>g</sup>Of the 44 fresh unresolved false-positives, 38 showed genus-level agreement, while the remaining six were one *E. coli* called *E.*

141 *coli*+CNS+*Enterobacter* spp., one *S. aureus*+*Pantoea* spp. mix called *Klebsiella* spp., one *Klebsiella pneumoniae* called

142 *Klebsiella* spp.+*E. coli*, one *Lactococcus raffinolactis* called *Streptococcus* spp., one *Streptococcus parasanguinis* called

143 *Streptococcus* spp.+*C. glabrata* and one *Acinetobacter lwoffii* called *A. baumannii*+*Enterobacter* spp. by the Accelerate Pheno™

144 system.

145 <sup>h</sup>Of the 29 seeded samples containing unresolved false-positives, 16 showed genus-level agreement, while the remaining 13 were

146 one *Enterococcus cecorum* called *E. faecalis*+*C. glabrata*, one *Pantoea* spp. called *Enterobacter* spp., one *C. koseri* called

147 *Citrobacter* spp.+*Proteus* spp., two *C. koseri* called *Citrobacter* spp.+*Klebsiella* spp., one *C. freundii* called *Citrobacter* spp.+*P.*

148 *aeruginosa*, one *C. koseri* sample called *Citrobacter* spp.+*E. faecium*+*Klebsiella* spp., one *E. cloacae* complex and one *E.*

149 *aerogenes* called *Enterobacter* spp.+*P. aeruginosa*, one *P. mirabilis* called *Proteus* spp.+*E. coli*, one *E. coli* called *E.*

150 *coli*+*Citrobacter* spp., one *Streptococcus pyogenes* called *Streptococcus* spp.+*E. faecium*, and one *S. marcescens* called *S.*

151 *marcescens*+*A. baumannii*+*Enterobacter* spp.+*P. aeruginosa*+*S. aureus* by the Accelerate Pheno™ system.

152

153 **Table S1: Gram-positive Target Organism/Antimicrobial Combinations with Reportable**  
 154 **Ranges**

| Class                     | Antimicrobial <sup>a</sup>                 | ID Target |                      |                      |        |        |
|---------------------------|--------------------------------------------|-----------|----------------------|----------------------|--------|--------|
|                           |                                            | SAU       | SLU                  | CNS                  | EFM    | EFS    |
| Penicillins               | Ampicillin                                 |           |                      |                      | 2-32   | 2-32   |
| Cephalosporins            | Ceftaroline                                | 0.25-8    |                      |                      |        |        |
| Lipopeptides              | Daptomycin                                 | 0.25-2    | 0.25-2 <sup>b</sup>  | 0.25-2               | 1-8    | 1-8    |
| Tetracyclines             | Doxycycline <sup>b</sup>                   | 1-32      | 1-32                 | 1-32                 | 2-32   |        |
| Macrolides                | Erythromycin                               | 0.12-16   | 0.12-16 <sup>b</sup> | 0.12-16 <sup>b</sup> |        | 0.5-16 |
| Oxazolidinones            | Linezolid                                  | 1-16      | 1-16 <sup>b</sup>    | 1-16 <sup>b</sup>    | 0.5-16 | 16     |
| Folate pathway inhibitors | Trimethoprim-Sulfamethoxazole <sup>b</sup> | 0.5-8     | 0.5-8                |                      |        |        |
| Glycopeptides             | Vancomycin                                 | 0.5-32    | 1-64                 | 1-64                 | 1-64   | 1-64   |
| Resistance Phenotypes     | Cefoxitin (MRSA)                           | Pos/Neg   | Pos/Neg              | Pos/Neg              |        |        |
|                           | Erythromycin-Clindamycin (MLSb)            |           | Pos/Neg              | Pos/Neg              |        |        |

155 Abbreviations: SAU=*Staphylococcus aureus*; SLU=*Staphylococcus lugdunensis*; CNS=Coagulase-  
 156 negative *Staphylococcus* spp. (i.e., *Staphylococcus epidermidis*, *Staphylococcus haemolyticus*,  
 157 *Staphylococcus hominis*, *Staphylococcus capitis*, *Staphylococcus lugdunensis*, *Staphylococcus warneri*,  
 158 not differentiated); EFM=*Enterococcus faecium*; EFS=*Enterococcus faecalis*; STR=*Streptococcus* spp.  
 159 (i.e., *Streptococcus mitis*, *Streptococcus oralis*, *Streptococcus gallolyticus*, *Streptococcus agalactiae*,  
 160 *Streptococcus pneumoniae*, not differentiated)

161 <sup>a</sup>Antimicrobial concentrations are listed in µg/mL.

162 <sup>b</sup>RUO

163

164 **Table S2: Gram-negative Target Organism/Antimicrobial Combinations with Reportable**  
 165 **Ranges**

| Class            | Antimicrobial <sup>a</sup> | ID Target  |            |            |            |            |            |            | ABA                     |
|------------------|----------------------------|------------|------------|------------|------------|------------|------------|------------|-------------------------|
|                  |                            | ECO        | KLE        | ENT        | CIT        | PRO        | SM<br>A    | PAE        |                         |
| Aminoglycosides  | Amikacin                   | 4-128      | 4-128      | 4-128      | 4-128      | 4-128      | 4-<br>128  | 4-128      | 4-128                   |
|                  | Gentamicin                 | 1-32       | 1-32       | 1-32       | 1-32       | 1-32       | 1-32       | 1-32       |                         |
|                  | Tobramycin                 | 1-32       | 1-32       | 1-32       | 1-32       | 1-32       | 1-32       | 1-32       |                         |
| Carbapenems      | Ertapenem                  | 0.12-<br>4 | 0.12-<br>4 | 0.12-<br>4 | 0.12-<br>4 | 0.12-<br>4 | 0.12-<br>4 | 0.12-<br>4 |                         |
|                  |                            | 0.25-<br>8 | 0.25-<br>8 | 0.5-8      | 0.25-<br>8 | 0.25-<br>8 | 0.25-<br>8 | 1-16       | 0.5-<br>16 <sup>b</sup> |
|                  |                            | 0.5-<br>16 | 0.5-<br>16 |            |            |            |            |            |                         |
| Cephalosporins   | Cefazolin <sup>b</sup>     |            |            |            |            |            |            |            |                         |
|                  | Cefepime                   | 1-32       | 1-32       | 1-32       | 1-32       | 1-32       | 1-32       | 2-32       | 2-64 <sup>b</sup>       |
|                  | Ceftazidime                | 2-32       | 2-32       | 2-32       | 2-32       | 1-32       | 1-32       | 2-32       |                         |
|                  | Ceftriaxone                | 0.25-<br>8 | 0.25-<br>8 | 0.25-<br>8 | 0.25-<br>8 | 0.5-8      | 0.5-8      |            |                         |
| Fluoroquinolones | Ciprofloxacin              | 0.25-<br>8 | 0.25-<br>8 | 0.5-8      | 0.25-<br>8 | 0.25-<br>8 | 0.25-<br>8 | 0.25-8     | 0.25-<br>8 <sup>b</sup> |
| Monobactams      | Aztreonam                  | 1-32       | 1-32       | 1-32       | 1-32       | 1-32       | 1-32       |            |                         |
| BL-BLIs          | Ampicillin-Sulbactam       | 2-64       | 2-64       |            |            | 4-64       |            |            | 2-64 <sup>b</sup>       |
|                  | Piperacillin-Tazobactam    | 4-256      | 4-256      | 4-256      | 4-256      | 4-256      | 4-<br>256  | 8-256      | 4-256                   |
| Polymyxins       | Colistin <sup>b</sup>      | 0.5-8      | 0.5-8      | 0.5-8      | 0.5-8      |            |            | 0.5-16     | 0.5-8                   |
| Tetracyclines    | Minocycline <sup>b</sup>   |            |            |            |            |            |            |            | 1-32                    |

166 Abbreviations: BL-BLIs=Beta-lactam / beta-lactamase inhibitors; ECO=*Escherichia coli*;  
 167 KLE=*Klebsiella* spp. (i.e., *Klebsiella pneumoniae*, *Klebsiella oxytoca*, not differentiated);  
 168 ENT=*Enterobacter* spp. (i.e., *Enterobacter cloacae*, *Enterobacter aerogenes*, not differentiated);  
 169 CIT=*Citrobacter* spp. (i.e., *Citrobacter freundii*, *Citrobacter koseri*, not differentiated); PRO=*Proteus*  
 170 spp. (i.e., *Proteus mirabilis*, *Proteus vulgaris*, not differentiated); SMA=*Serratia marcescens*;  
 171 PAE=*Pseudomonas aeruginosa*; ABA=*Acinetobacter baumannii*  
 172 <sup>a</sup>Antimicrobial concentrations are listed in µg/mL.

173 <sup>b</sup>RUO

174

175



176 **TABLE S3** Identification Performance by DNA Probe at FDA Clearance

| Probe                             | TP   | FN | TN    | FP  | Sensitivity |              | Specificity |              |  |
|-----------------------------------|------|----|-------|-----|-------------|--------------|-------------|--------------|--|
|                                   |      |    |       |     | %           | 95% CI       | %           | 95% CI       |  |
| <b>Gram-Positive</b>              |      |    |       |     |             |              |             |              |  |
| <i>Staphylococcus aureus</i>      | 238  | 5  | 1548  | 24  | 97.9        | (95.3-99.1)  | 98.5        | (91.1-98.3)  |  |
| CNS <sup>a</sup>                  | 243  | 12 | 1458  | 27  | 95.3        | (92.0-97.3)  | 98.2        | (97.4-98.8)  |  |
| <i>Staphylococcus lugdunensis</i> | 77   | 2  | 1748  | 1   | 97.5        | (91.2-99.3)  | 99.9        | (99.7-100.0) |  |
| <i>Enterococcus faecium</i>       | 100  | 2  | 1724  | 15  | 98          | (93.1-99.5)  | 99.1        | (98.6-99.5)  |  |
| <i>Enterococcus faecalis</i>      | 98   | 3  | 1726  | 2   | 97          | (91.6-99.0)  | 99.9        | (99.6-100)   |  |
| <i>Streptococcus</i> spp.         | 171  | 5  | 1615  | 39  | 97.2        | (93.5-98.)   | 97.6        | (96.8-98.3)  |  |
| Gram-Positive Total               | 927  | 29 | 9819  | 108 | 97          | (95.7-97.9)  | 98.9        | (98.7-99.1)  |  |
| <b>Gram-Negative</b>              |      |    |       |     |             |              |             |              |  |
| <i>Escherichia coli</i>           | 92   | 3  | 1677  | 12  | 96.8        | (93.3-98.9)  | 99.3        | (99.3-99.9)  |  |
| <i>Klebsiella</i> spp.            | 144  | 4  | 1690  | 5   | 97.3        | (91.1-98.3)  | 99.7        | (99.2-99.8)  |  |
| <i>Enterobacter</i> spp.          | 122  | 5  | 1651  | 6   | 96.1        | (92.3-99.1)  | 99.6        | (99.0-99.7)  |  |
| <i>Proteus</i> spp.               | 107  | 3  | 1682  | 9   | 97.3        | (92.1-99.4)  | 99.5        | (99.2-99.8)  |  |
| <i>Citrobacter</i> spp.           | 86   | 2  | 1751  | 7   | 97.7        | (91.1-98.9)  | 99.6        | (98.8-99.6)  |  |
| <i>Serratia marcescens</i>        | 51   | 0  | 1795  | 2   | 100         | (93.0-100.0) | 99.9        | (99.6-100)   |  |
| <i>Pseudomonas aeruginosa</i>     | 58   | 0  | 1779  | 10  | 100         | (93.8-100)   | 99.4        | (99.0-99.7)  |  |
| <i>Acinetobacter baumannii</i>    | 68   | 1  | 1764  | 6   | 98.6        | (92.2-99.9)  | 99.7        | (99.3-99.8)  |  |
| Gram-Negative Total               | 728  | 18 | 13789 | 57  | 97.6        | (96.2-98.5)  | 99.6        | (99.5-99.7)  |  |
| <b>Yeast</b>                      |      |    |       |     |             |              |             |              |  |
| <i>Candida albicans</i>           | 45   | 0  | 1777  | 8   | 100         | (92.1-100)   | 99.6        | (99.1-99.8)  |  |
| <i>Candida glabrata</i>           | 50   | 0  | 1754  | 29  | 100         | (92.9-100)   | 98.4        | (97.7-98.87) |  |
| Yeast Total                       | 95   | 0  | 3531  | 37  | 100         | (96.1-100)   | 99          | (98.6-99.3)  |  |
| <b>Overall</b>                    | 1750 | 47 | 27139 | 202 | 97.4        | (96.5-98.0)  | 99.3        | (99.2-99.4)  |  |

177 <sup>a</sup>Coagulase-Negative *Staphylococcus* spp.

178 **TABLE S4** Invalid, Indeterminate and False Positive Rates by Sample Type

|                                         | FDA Clearance |              |                     | 2017 Software Update |              |                     |
|-----------------------------------------|---------------|--------------|---------------------|----------------------|--------------|---------------------|
|                                         | Fresh         | Seeded       | Overall             | Fresh                | Seeded       | Overall             |
| N. Total Samples                        | 872           | 1068         | <b>1940</b>         | 872                  | 1068         | <b>1940</b>         |
| Invalid                                 | 79 (9.1%)     | 11 (1.0%)    | <b>90 (4.6%)</b>    | 0 (0.0%)             | 2 (0.2%)     | <b>2 (0.1%)</b>     |
| Valid                                   | 793 (90.9%)   | 1057 (99.0%) | <b>1850 (95.4%)</b> | 872 (100%)           | 1066 (99.8%) | <b>1938 (99.9%)</b> |
| Indeterminate <sup>a,b</sup>            | 74 (9.3%)     | 198 (18.7)   | <b>272 (14.7%)</b>  | 39 (4.5%)            | 6 (0.6%)     | <b>45 (2.3%)</b>    |
| False Positives <sup>b</sup>            | 95 (12.0%)    | 84 (7.9%)    | <b>179 (9.7%)</b>   | 83 (9.5%)            | 60 (5.6%)    | <b>143 (7.4%)</b>   |
| Resolved False Positives <sup>c</sup>   | 51 (53.7%)    | 55 (65.5%)   | <b>106 (59.2%)</b>  | 35 (42.2%)           | 36 (60.0%)   | <b>71 (49.7%)</b>   |
| Unresolved False Positives <sup>c</sup> | 44 (46.3%)    | 29 (34.5%)   | <b>73 (40.8%)</b>   | 48 (57.8%)           | 24 (40.0%)   | <b>72 (50.3%)</b>   |

179 <sup>a</sup>Samples with any indeterminate results.

180 <sup>b</sup>Rates calculated out of total valid results

181 <sup>c</sup>Rates calculated out of total false positives

**Table S5: Accelerate PhenoTest™ BC Kit Limitations**

| <b>Category</b>                     | <b>Limitation Language</b>                                                                                                                                                                                                                                                                                     | <b>Antibiotic</b>                  | <b>Bacteria</b>                                                                                               |
|-------------------------------------|----------------------------------------------------------------------------------------------------------------------------------------------------------------------------------------------------------------------------------------------------------------------------------------------------------------|------------------------------------|---------------------------------------------------------------------------------------------------------------|
| Insufficient number of R strains    | The ability of the Accelerate PhenoTest™ BC kit to detect resistance in the following combinations is unknown because an insufficient number of resistant isolates were encountered at the time of comparable testing:                                                                                         | Amikacin                           | <i>Citrobacter</i> spp., <i>Enterobacter</i> spp., <i>E. coli</i> , <i>Proteus</i> spp., <i>S. marcescens</i> |
|                                     |                                                                                                                                                                                                                                                                                                                | Aztreonam                          | <i>Proteus</i> spp., <i>S. marcescens</i>                                                                     |
|                                     |                                                                                                                                                                                                                                                                                                                | Cefepime                           | <i>Citrobacter</i> spp., <i>Proteus</i> spp., <i>S. marcescens</i>                                            |
|                                     |                                                                                                                                                                                                                                                                                                                | Ceftazidime                        | <i>Proteus</i> spp., <i>S. marcescens</i>                                                                     |
|                                     |                                                                                                                                                                                                                                                                                                                | Ceftaroline                        | <i>S. aureus</i>                                                                                              |
|                                     |                                                                                                                                                                                                                                                                                                                | Ceftriaxone                        | <i>Citrobacter</i> spp., <i>E. cloacae</i> , <i>S. marcescens</i>                                             |
|                                     |                                                                                                                                                                                                                                                                                                                | Ciprofloxacin                      | <i>Citrobacter</i> spp., <i>Proteus</i> spp., <i>S. marcescens</i>                                            |
|                                     |                                                                                                                                                                                                                                                                                                                | Daptomycin                         | <i>S. aureus</i>                                                                                              |
|                                     |                                                                                                                                                                                                                                                                                                                | Ertapenem                          | <i>Citrobacter</i> spp., <i>Proteus</i> spp., and <i>S. marcescens</i>                                        |
|                                     |                                                                                                                                                                                                                                                                                                                | Gentamicin                         | <i>Citrobacter</i> spp., <i>Enterobacter</i> spp., <i>Proteus</i> spp., <i>S. marcescens</i>                  |
|                                     |                                                                                                                                                                                                                                                                                                                | Meropenem                          | <i>Citrobacter</i> spp., <i>E. coli</i> , <i>Proteus</i> spp., and <i>S. marcescens</i>                       |
|                                     |                                                                                                                                                                                                                                                                                                                | Piperacillin/Tazobactam            | <i>Proteus</i> spp., and <i>S. marcescens</i>                                                                 |
|                                     |                                                                                                                                                                                                                                                                                                                | Tobramycin                         | <i>Citrobacter</i> spp., <i>Proteus</i> spp., <i>S. marcescens</i>                                            |
|                                     |                                                                                                                                                                                                                                                                                                                | Cefoxitin (Methicillin Resistance) | <i>S. lugdunensis</i>                                                                                         |
| Insufficient number of NS strains   | The current absence of data on daptomycin-resistant isolates precludes defining any categories other than “susceptible”. Isolates yielding test results suggestive of a non-susceptible category should be retested and if the result is confirmed, the isolate should be retested using the reference method. | Erythromycin/Clindamycin (MLSb)    | <i>S. lugdunensis</i>                                                                                         |
|                                     |                                                                                                                                                                                                                                                                                                                | Daptomycin                         | <i>Staphylococcus</i> spp. (excluding <i>S. lugdunensis</i> ), <i>Enterococcus</i> spp.                       |
| Insufficient number of VISA strains | The ability of the Accelerate PhenoTest™ BC kit to detect vancomycin-intermediate <i>Staphylococcus aureus</i> isolates (VISA) is unknown because insufficient numbers of VISA isolates were evaluated at the time of comparative testing.                                                                     | Vancomycin                         | <i>S. aureus</i>                                                                                              |

| Category                                            | Limitation Language                                                                                                                                                                                                                                             | Antibiotic                                                                                              | Bacteria                                                                                                                                                                                                                                                                              |
|-----------------------------------------------------|-----------------------------------------------------------------------------------------------------------------------------------------------------------------------------------------------------------------------------------------------------------------|---------------------------------------------------------------------------------------------------------|---------------------------------------------------------------------------------------------------------------------------------------------------------------------------------------------------------------------------------------------------------------------------------------|
| Major error limitations                             | The following antimicrobial/organism combinations may produce a resistant result that can be found susceptible by the reference method. If critical to patient care confirm these results with an alternate method:                                             | Ceftazidime<br>Cefepime<br>Ertapenem<br>Meropenem<br>Piperacillin/Tazobactam<br>Piperacillin/Tazobactam | <i>P. aeruginosa</i> (Any <i>P. aeruginosa</i> isolate that provides an MIC $\geq 16$ $\mu\text{g/mL}$ should be retested using an alternate method)<br><i>P. aeruginosa</i><br><i>Enterobacter</i> spp.<br><i>Enterobacter</i> spp.<br><i>A. baumannii</i><br><i>Klebsiella</i> spp. |
| Essential agreement limitation                      | Due to a low essential agreement for <i>Serratia marcescens</i> with ceftriaxone, results should be confirmed with an alternate method if critical to patient care.                                                                                             | Ceftriaxone                                                                                             | <i>S. marcescens</i>                                                                                                                                                                                                                                                                  |
| Inaccurate MIC's in the R range                     | The ability of the Accelerate PhenoTest™ BC kit to provide accurate MICs with amikacin resistant strains of <i>A. baumannii</i> has not been established; isolates of this species that provide resistant results should be confirmed by an alternative method. | Amikacin                                                                                                | <i>A. baumannii</i>                                                                                                                                                                                                                                                                   |
| MIC's tend to be one dilution higher than reference | Accelerate PhenoTest™ BC kit "antibiotic" MIC values for "organism" tended to be one doubling dilution higher than the reference MIC value.                                                                                                                     | Ampicillin/Sulbactam<br>Aztreonam<br>Ceftazidime<br>Ertapenem                                           | Enterobacteriaceae                                                                                                                                                                                                                                                                    |
| MIC's tend to be one dilution lower than reference  | Accelerate PhenoTest™ BC kit ceftazidime MIC values for <i>P. aeruginosa</i> tended to be one doubling dilution lower than the reference MIC value.                                                                                                             | Ceftazidime                                                                                             | <i>P. aeruginosa</i>                                                                                                                                                                                                                                                                  |
